# Supplementary material
Source: PubMed Central journal article supplement (PMC3352571)
Supplement: supp_92.12.2810_Supplementary_Fig_S1.pdf [file supp_92.12.2810_Supplementary_Fig_S1.pdf]

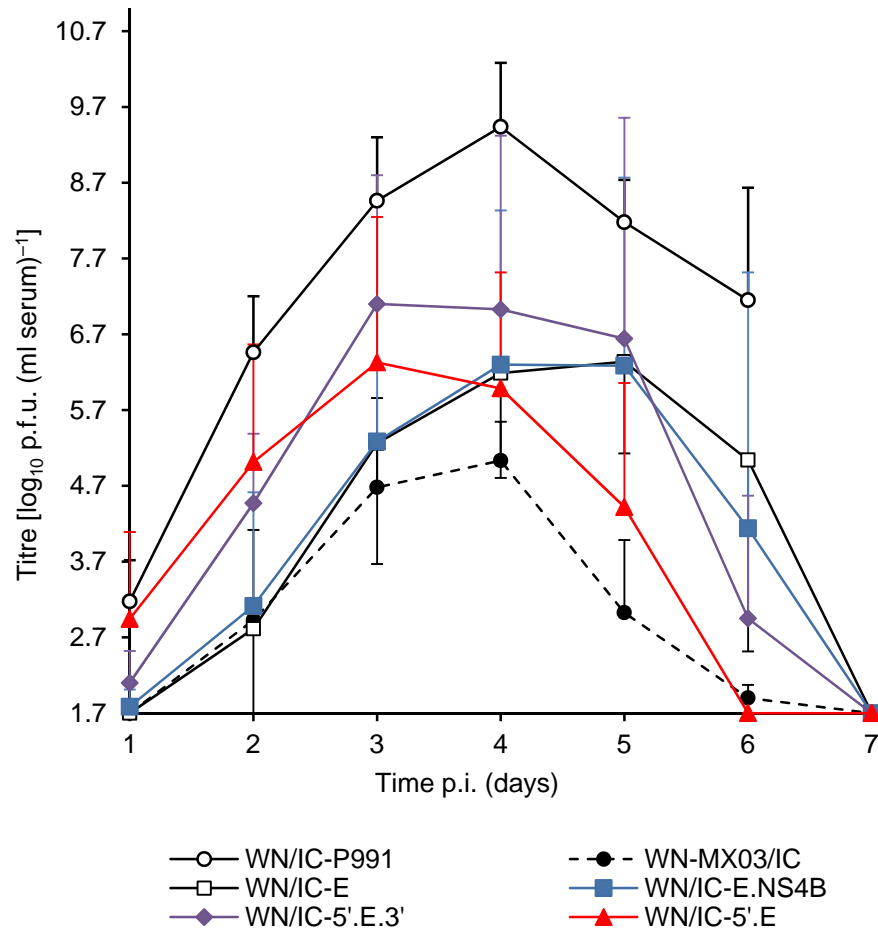

**Supplementary Fig. S1.** Selected viraemia profiles of AMCRs inoculated with 1500 p.f.u. parental genotype and NY99/MX03 point-mutant viruses. Crows were inoculated with WN/IC-P991 ( $n=8$ ), WN/IC-E ( $n=8$ ), WN/IC-5'.E.3' ( $n=7$ ), WN/IC-5'.E ( $n=7$ ), WN/IC-E.NS4B ( $n=6$ ) or WN-MX03/IC ( $n=3$ ). Titres were determined by standard plaque assay on Vero cells, with a limit of detection of  $1.7 \log_{10}$  p.f.u. (ml serum) $^{-1}$ . Results are shown as means $\pm$ SD, and only positive or negative values are presented for clarity.
